# Supplementary material
Source: Springer Nature journal article supplement (https://www.springermedizin.de/resource/supplementary/12936_2010_1345_MOESM4_ESM.pdf/9549570)

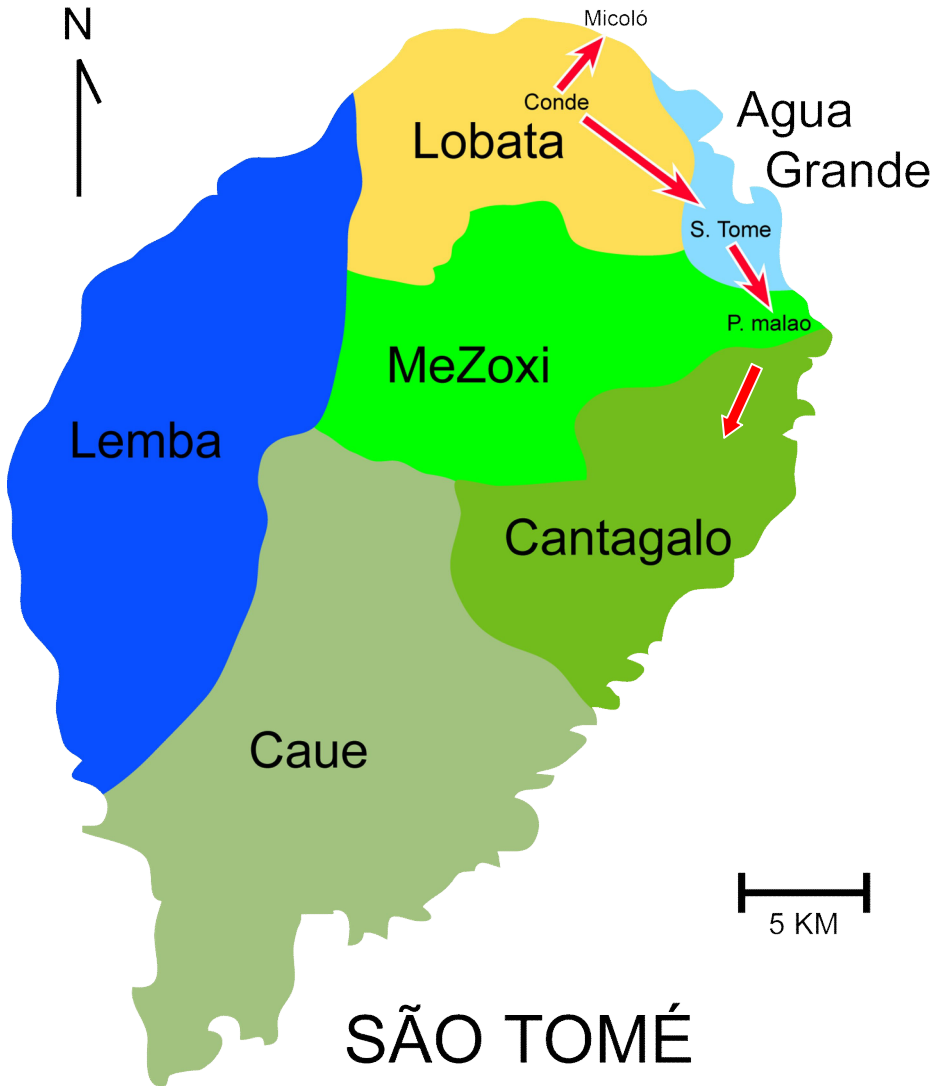

Supplement: MOESM4 [file 9549570]
